# Supplementary material for: Sarcopenia in Chronic Kidney Disease: A Scoping Review of Prevalence, Risk Factors, Association with Outcomes, and Treatment
Source: PubMed Central journal article supplement (PMC8732833; doi:10.1007/s00223-021-00898-1), 2021-08-12
Supplement: 223_2021_898_MOESM1_ESM.pdf [file 223_2021_898_MOESM1_ESM.pdf]

## SUPPLEMENTARY MATERIAL

**Table 1. Initial search strategy for PUBMED: Terms used and number of articles screened.**

|                                      |                                          |
|--------------------------------------|------------------------------------------|
| Sarcopenia AND                       | Sarcopenia Treatment AND                 |
| i. Renal Failure: 109                | i. Renal Failure: 77                     |
| ii. Chronic kidney disease: 194      | ii. Chronic kidney disease: 120          |
| iii. Kidney Failure: 93              | iii. Kidney Failure: 69                  |
| iv. Hemodialysis: 151                | iv. Hemodialysis: 111                    |
| v. Peritoneal dialysis: 21           | v. Peritoneal dialysis: 18               |
| vi. End-stage renal disease: 44      | vi. End-stage renal disease: 32          |
| Sarcopenia Definitions AND           | Low muscle mass AND                      |
| i. Renal Failure: 2                  | i. Renal Failure: 153                    |
| ii. Chronic kidney disease: 7        | ii. Chronic kidney disease: 94           |
| iii. Kidney Failure: 2               | iii. Kidney Failure: 130                 |
| iv. Hemodialysis: 9                  | iv. Hemodialysis: 195                    |
| v. Peritoneal dialysis: 4            | v. Peritoneal dialysis: 47               |
| vi. End-stage renal disease: 0       | vi. End-stage renal disease: 37          |
| Sarcopenia AND clinical outcomes AND | Low muscle strength AND                  |
| i. Renal Failure: 15                 | i. Renal Failure: 54                     |
| ii. Chronic kidney disease: 24       | ii. Chronic kidney disease: 68           |
| iii. Kidney Failure: 11              | iii. Kidney Failure: 50                  |
| iv. Hemodialysis: 22                 | iv. Hemodialysis: 82                     |
| v. Peritoneal dialysis: 2            | v. Peritoneal dialysis: 9                |
| vi. End-stage renal disease: 6       | vi. End-stage renal disease: 19          |
| Sarcopenia AND mortality AND         | Sarcopenia therapeutic interventions AND |
| i. Renal Failure: 43                 | i. Renal Failure: 4                      |
| ii. Chronic kidney disease: 71       | ii. Chronic kidney disease: 14           |
| iii. Kidney Failure: 41              | iii. Kidney Failure: 3                   |
| iv. Hemodialysis: 61                 | iv. Hemodialysis: 10                     |
| v. Peritoneal dialysis: 13           | v. Peritoneal dialysis: 3                |
| vi. End-stage renal disease: 20      | vi. End-stage renal disease: 3           |
| Sarcopenia AND fractures AND         | Sarcopenia AND disability AND            |
| i. Renal Failure: 2                  | i. Renal Failure: 5                      |
| ii. Chronic kidney disease: 11       | ii. Chronic kidney disease: 9            |
| iii. Kidney Failure: 0               | iii. Kidney Failure: 3                   |
| iv. Hemodialysis: 7                  | iv. Hemodialysis: 7                      |
| v. Peritoneal dialysis: 2            | v. Peritoneal dialysis: 3                |
| vi. End-stage renal disease: 0       | vi. End-stage renal disease: 1           |
| Sarcopenia AND hospitalization AND   | Sarcopenia AND falls AND                 |
| i. Renal Failure: 7                  | i. Renal Failure: 2                      |
| ii. Chronic kidney disease: 7        | ii. Chronic kidney disease: 9            |
| iii. Kidney Failure: 8               | iii. Kidney Failure: 2                   |
| iv. Hemodialysis: 10                 | iv. Hemodialysis: 6                      |
| v. Peritoneal dialysis: 1            | v. Peritoneal dialysis: 1                |
| vi. End-stage renal disease: 0       | vi. End-stage renal disease: 1           |

**2926 total number of articles screened**
